# Supplementary material for: Paddlewheel-type and half-paddlewheel-type diruthenium(ii,ii) complexes with 1,8-naphthyridine-2-carboxylate
Source: Royal Society of Chemistry journal article supplement (doi:10.1039/d4dt03321c), 2025-01-01
Supplement: d4dt03321c1.pdf [file d4dt03321c1.pdf]

*Electronic Supplementary Information*

**Paddlewheel-type and half-paddlewheel-type diruthenium(II,II) complexes with 1,8-naphthyridine-2-carboxylate**

Yusuke Kataoka,\*<sup>a</sup> Nozomi Tada,<sup>a</sup> Naoki Masamori,<sup>a</sup> Natsumi Yano,<sup>a</sup> Chikako Moriyoshi,<sup>b</sup>  
Makoto Handa\*<sup>a</sup>

<sup>a</sup> Department of Chemistry, Graduate School of Natural Science and Technology, Shimane University

<sup>b</sup> Graduate School of Advanced Science and Engineering, Hiroshima University,

*Contents*

Scheme S1. Molecular structures of (a) *cis*-2:2- and (b) *trans*-2:2-arrangements of  $[\text{Ru}_2(\mu\text{-npc})_2(\text{O}_2\text{CR})_2]$ .

Fig. S1. Observed and simulated ESI-TOF-MS spectra of **1**.

Fig. S2. <sup>1</sup>H NMR spectrum of **1** in DMSO-*d*<sub>6</sub>.

Fig. S3. Observed and simulated ESI-TOF-MS spectra of **2**.

Fig. S4. Observed and simulated ESI-TOF-MS spectra of **3**.

Fig. S5. <sup>1</sup>H NMR spectrum of **2** in DMSO-*d*<sub>6</sub>.

Fig. S6. <sup>1</sup>H NMR spectrum of **3** in DMSO-*d*<sub>6</sub>.

Table S1. Selected bond lengths (Å) and angles (°) of crystal structure of **1**.

Table S2. Selected bond lengths (Å) and angles (°) of crystal structure of **2**.

Table S3. Selected bond lengths (Å) and angles (°) of crystal structure of **3**.

Table S4. Averaged bond lengths (Å) and angles (°) of optimized geometries of **1-3**.

Table S5. Table S5. Result of TDDFT calculation of **1** (H and L indicate the HOMO and LUMO, respectively).

Table S6. Table S5. Result of TDDFT calculation of **2** (H and L indicate the HOMO and LUMO, respectively).

Table S7. Table S5. Result of TDDFT calculation of **3** (H and L indicate the HOMO and LUMO, respectively).

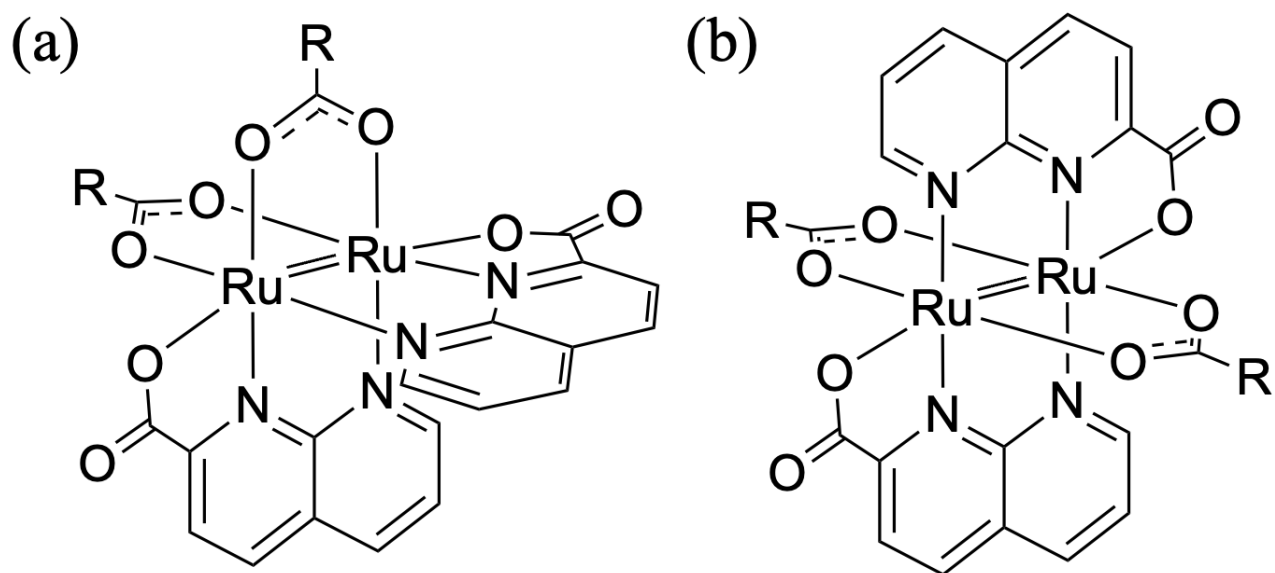

Scheme S1. Molecular structures of (a) *cis*-2:2- and (b) *trans*-2:2-arrangments of  $[Ru_2(\mu\text{-npc})_2(O_2CR)_2]$ .

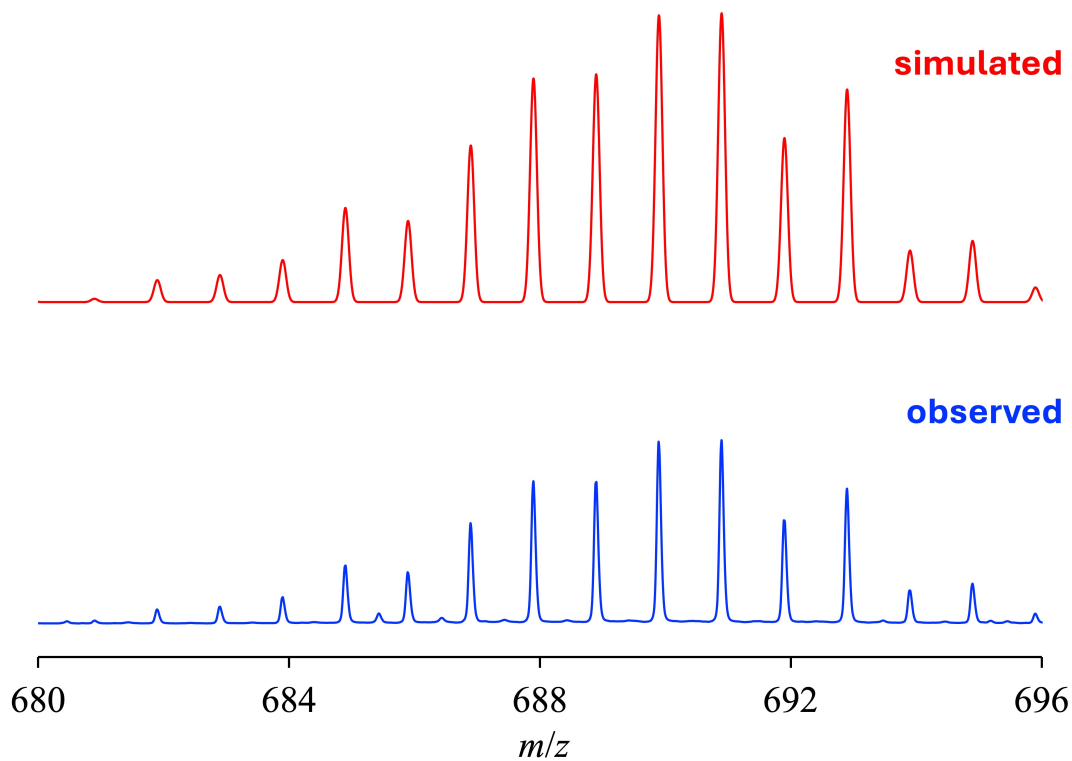

Fig. S1. Observed and simulated ESI-TOF-MS spectra of 1.

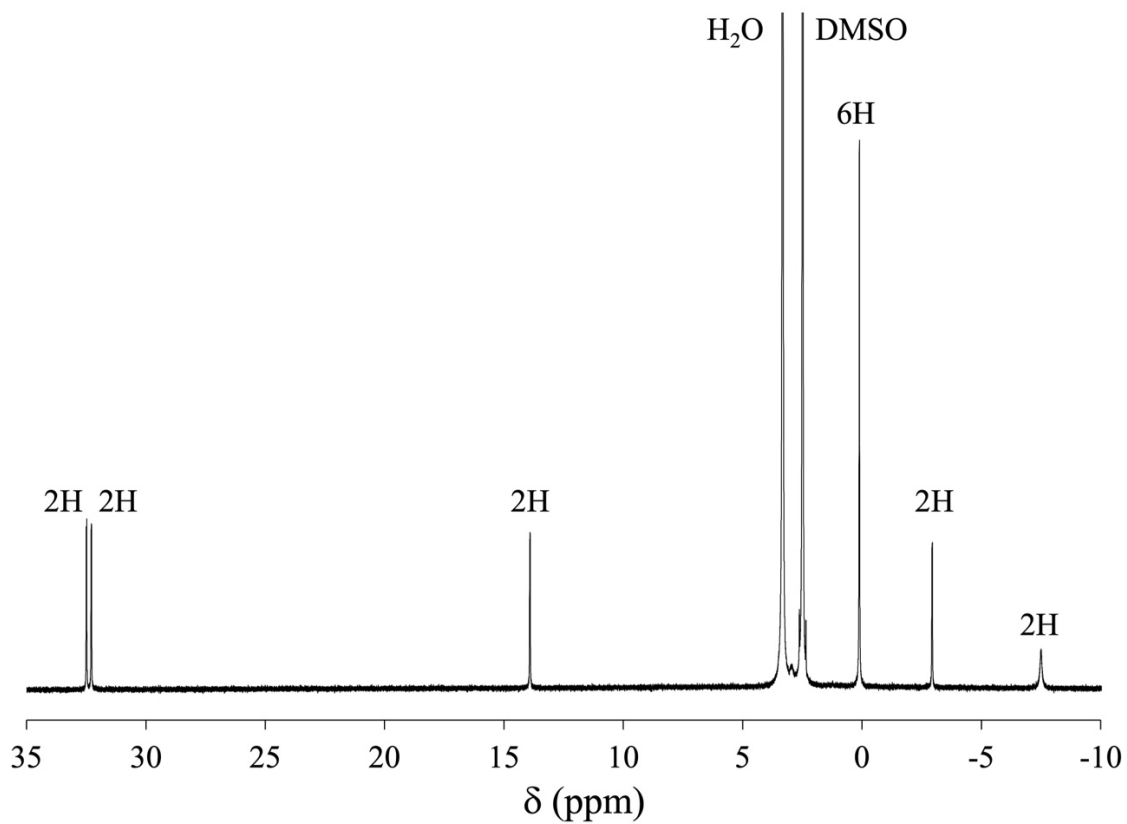

Fig. S2. <sup>1</sup>H NMR spectrum of 1 in DMSO-*d*<sub>6</sub>.

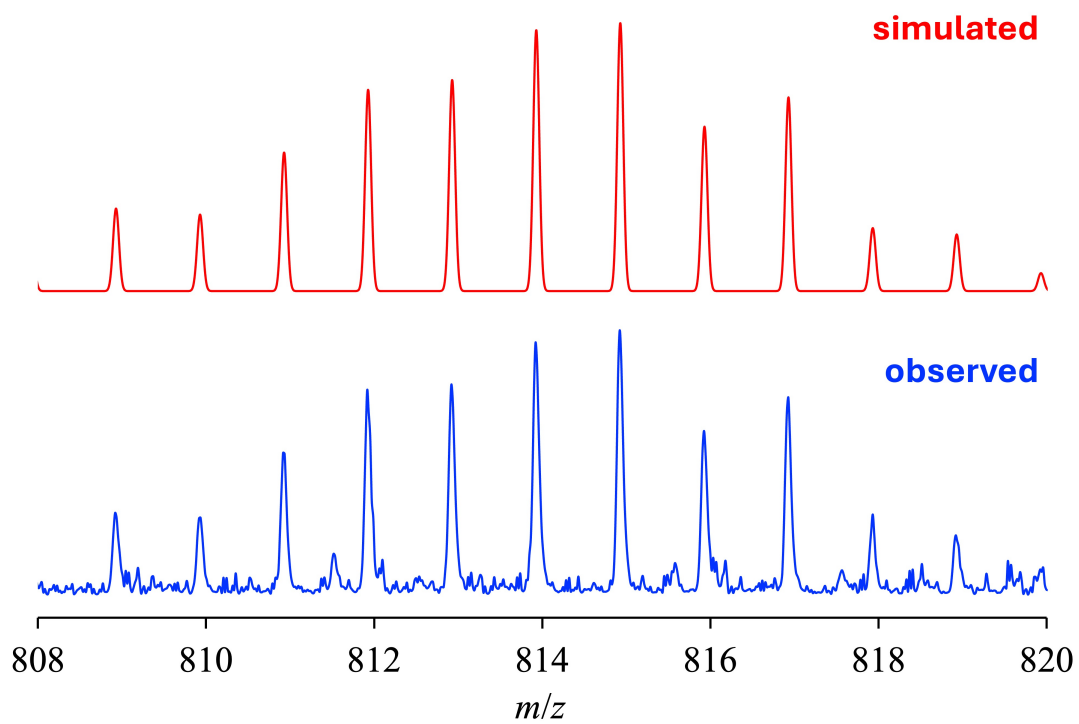

Fig. S3. Observed and simulated ESI-TOF-MS spectra of 2.

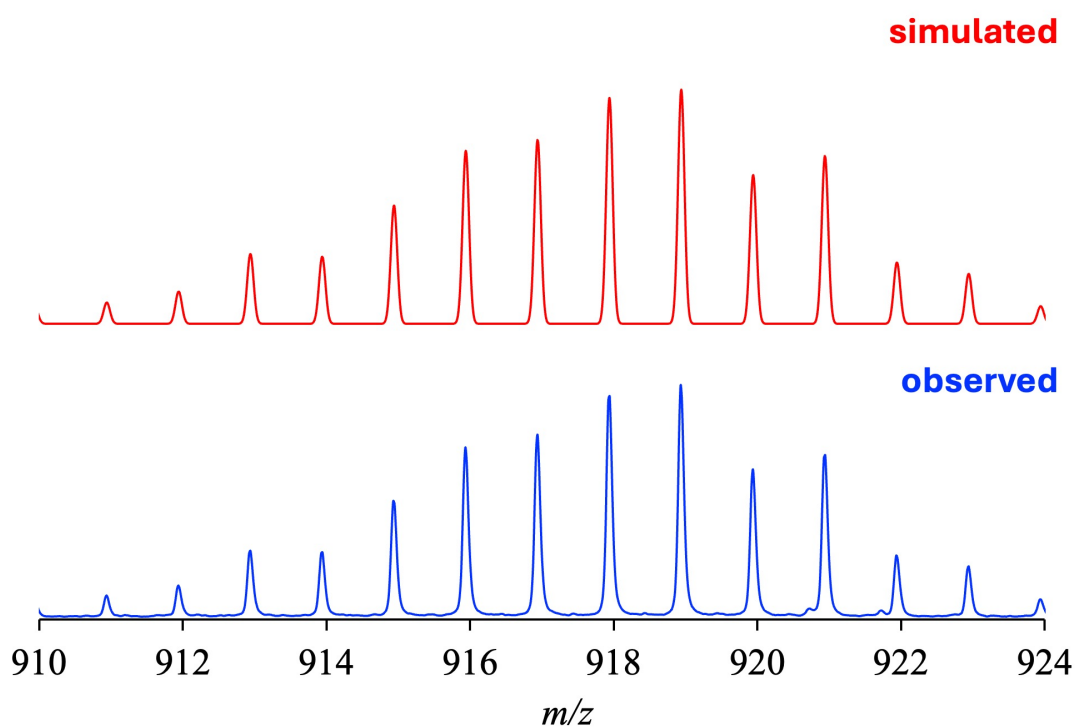

Fig. S4. Observed and simulated ESI-TOF-MS spectra of 3.

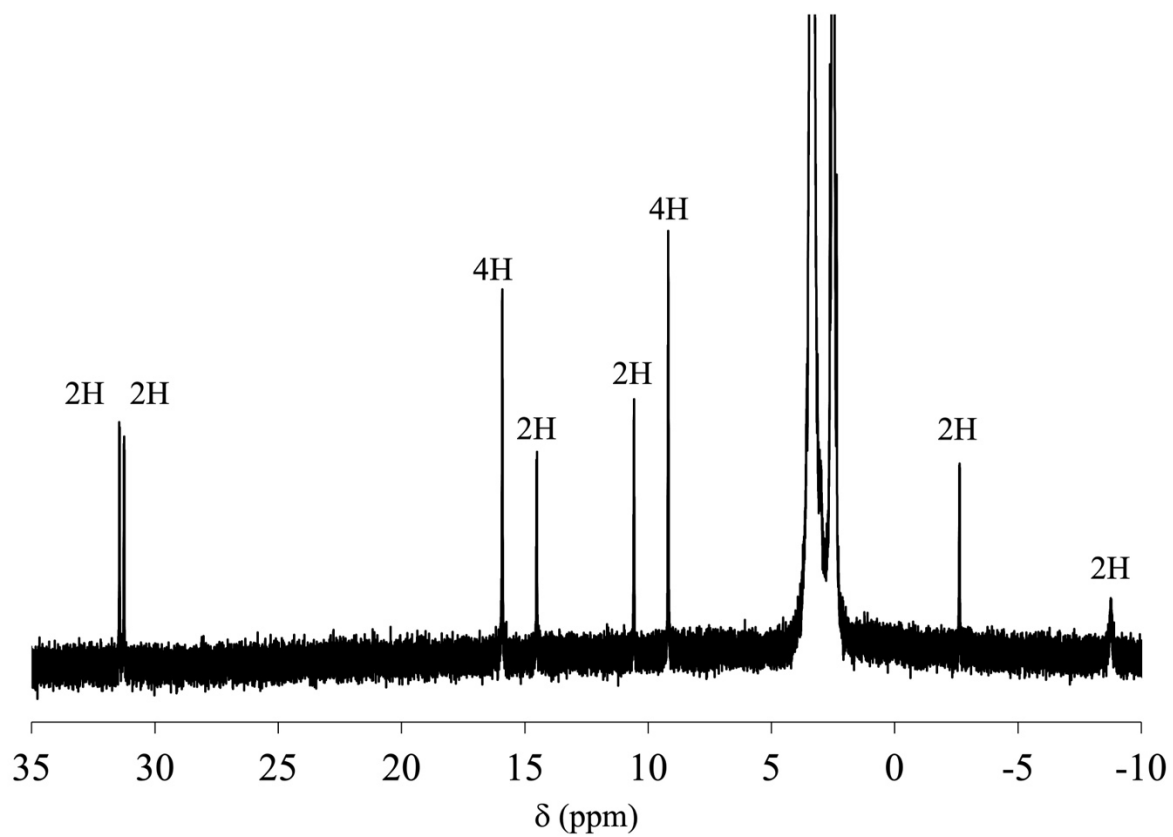

Fig. S5.  $^1\text{H}$  NMR spectrum of **2** in  $\text{DMSO-}d_6$ .

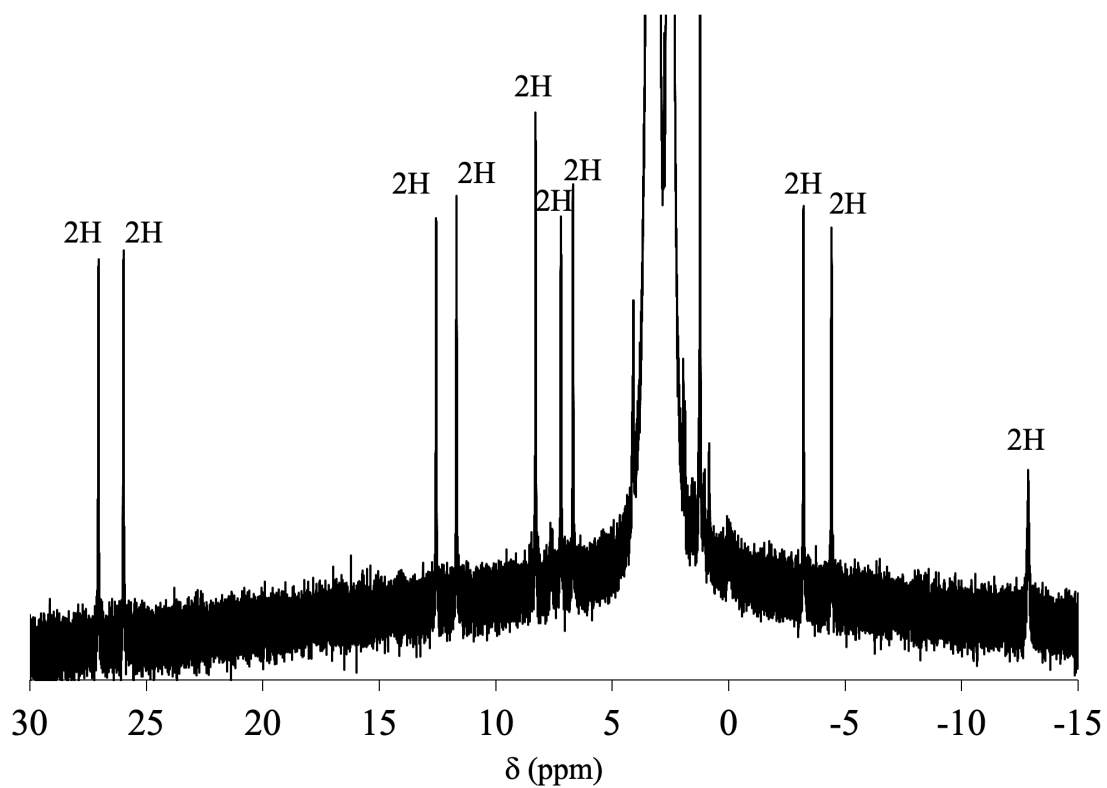

Fig. S6.  $^1\text{H}$  NMR spectrum of **3** in  $\text{DMSO-}d_6$ .

Table S1. Selected bond lengths (Å) and angles (°) of **1**.

| bond lengths (Å) |           |               |           |
|------------------|-----------|---------------|-----------|
| Ru1-Ru1'         | 2.2893(4) | C9-O1         | 1.267(4)  |
| Ru1-N1           | 2.039(2)  | C9-O2         | 1.234(4)  |
| Ru1-N2'          | 2.063(3)  | C10-O3        | 1.250(5)  |
| Ru1-O3           | 2.082(2)  | C10-O4        | 1.289(5)  |
| Ru1-O4'          | 2.069(2)  | C5-N1         | 1.364(3)  |
| Ru1-O1           | 2.243(2)  | C5-N2         | 1.384(4)  |
| bond angles (°)  |           |               |           |
| Ru1- Ru1'-N1'    | 90.17(6)  | Ru1- Ru1'-O1' | 165.87(6) |
| Ru1- Ru1'-N2'    | 90.81(7)  | N1-Ru1-O1     | 76.00(9)  |
| Ru1- Ru1'-O3'    | 88.13(6)  | O3-C10-O4     | 124.1(3)  |
| Ru1- Ru1'-O4     | 90.40(7)  | N1-C5-N2      | 115.9(2)  |

Table S2. Selected bond lengths (Å) and angles (°) of **2**.

| bond lengths (Å) |           |               |           |
|------------------|-----------|---------------|-----------|
| Ru1-Ru1'         | 2.2834(6) | C9-O1         | 1.286(6)  |
| Ru1-N1           | 2.044(3)  | C9-O2         | 1.230(6)  |
| Ru1-N2'          | 2.073(3)  | C10-O3        | 1.262(5)  |
| Ru1-O3           | 2.049(3)  | C10-O4        | 1.276(5)  |
| Ru1-O4'          | 2.085(3)  | C5-N1         | 1.360(5)  |
| Ru1-O1           | 2.225(3)  | C5-N2         | 1.367(6)  |
| bond angles (°)  |           |               |           |
| Ru1- Ru1'-N1'    | 90.87(10) | Ru1- Ru1'-O1' | 167.52(8) |
| Ru1- Ru1'-N2'    | 90.10(10) | N1-Ru1-O1     | 76.80(13) |
| Ru1- Ru1'-O3'    | 90.68(8)  | O3-C10-O4     | 124.0(3)  |
| Ru1- Ru1'-O4     | 88.14(8)  | N1-C5-N2      | 116.5(3)  |

Table S3. Selected bond lengths (Å) and angles (°) of **3**.

| bond lengths (Å) |            |              |            |
|------------------|------------|--------------|------------|
| Ru1-Ru1'         | 2.3582(6)  | C9-O1        | 1.249(8)   |
| Ru1-N1           | 2.061(4)   | C9-O2        | 1.236(8)   |
| Ru1-N2'          | 2.078(3)   | C18-O3       | 1.293(5)   |
| Ru1-N3           | 2.101(4)   | C18-O4       | 1.223(6)   |
| Ru1-O3           | 2.034(3)   | C5-N1        | 1.360(6)   |
| Ru1-O1           | 2.200(3)   | C5-N2        | 1.363(6)   |
| bond angles (°)  |            |              |            |
| Ru1- Ru1'-N1'    | 87.98(11)  | Ru1- Ru1'-O1 | 164.57(10) |
| Ru1- Ru1'-N2'    | 90.48(10)  | N1-Ru1-O1    | 76.60(14)  |
| Ru1- Ru1'-N3'    | 93.00(10)  | N3-Ru1-O3    | 79.71(14)  |
| Ru1- Ru1'-O3'    | 103.23(10) | N1-C5-N2     | 115.6(4)   |

Table S4. Averaged bond lengths (Å) and angles (°) of optimized geometries of **1-3**.

|                                             | <b>1</b> | <b>2</b> | <b>3</b> |
|---------------------------------------------|----------|----------|----------|
| Ru-Ru                                       | 2.318    | 2.318    | 2.415    |
| Ru-N <sub>(μ-npc)</sub>                     | 2.091    | 2.090    | 2.106    |
| Ru-O <sub>(μ-npc)</sub>                     | 2.256    | 2.255    | 2.245    |
| Ru-O <sub>(equatorial carboxylate)</sub>    | 2.099    | 2.096    | —        |
| Ru-N <sub>(η<sup>2</sup>-npc)</sub>         | —        | —        | 2.145    |
| Ru-O <sub>(η<sup>2</sup>-npc)</sub>         | —        | —        | 2.044    |
| Ru-Ru-N <sub>(μ-npc)</sub>                  | 90.17    | 90.18    | 88.68    |
| Ru-Ru-O <sub>(μ-npc)</sub>                  | 164.64   | 164.63   | 163.04   |
| Ru-Ru-O <sub>(equatorial carboxylate)</sub> | 89.00    | 89.01    | —        |
| Ru-Ru-O <sub>(η<sup>2</sup>-npc)</sub>      | —        | —        | 102.96   |
| Ru-Ru-N <sub>(η<sup>2</sup>-npc)</sub>      | —        | —        | 96.66    |

Table S5. Result of TDDFT calculation of **1** (H and L indicate the HOMO and LUMO, respectively).

| $S_n$ | Wavelength (nm) | $f$    | Major contributions                                                                                                                                                                                                                                                                                                                                                                                                  | Band |
|-------|-----------------|--------|----------------------------------------------------------------------------------------------------------------------------------------------------------------------------------------------------------------------------------------------------------------------------------------------------------------------------------------------------------------------------------------------------------------------|------|
| 3     | 775.5           | 0.0039 | H-1( $\beta$ ) [ $\sigma(\text{Ru}_2)$ ] $\rightarrow$ L+2( $\beta$ ) [ $\pi^*(\text{Ru}_2)$ ] (52%)<br>H-1( $\beta$ ) [ $\sigma(\text{Ru}_2)$ ] $\rightarrow$ L+1( $\beta$ ) [ $\pi^*(\text{npc})$ ] (22%)<br>H-3( $\beta$ ) [ $\pi(\text{Ru}_2)$ ] $\rightarrow$ L+3( $\beta$ ) [ $\pi^*(\text{Ru}_2)$ ] (14%)                                                                                                     | A    |
| 4     | 764.2           | 0.0326 | H( $\beta$ ) [ $\delta^*(\text{Ru}_2)$ ] $\rightarrow$ L( $\beta$ ) [ $\pi^*(\text{npc})$ ] (80%)                                                                                                                                                                                                                                                                                                                    |      |
| 5     | 750.9           | 0.0075 | H( $\beta$ ) [ $\delta^*(\text{Ru}_2)$ ] $\rightarrow$ L+1( $\beta$ ) [ $\pi^*(\text{npc})$ ] (64%)<br>H-2( $\alpha$ ) [ $\delta^*(\text{Ru}_2)$ ] $\rightarrow$ L+1( $\alpha$ ) [ $\pi^*(\text{npc})$ ] (20%)                                                                                                                                                                                                       |      |
| 12    | 611.7           | 0.0076 | H-3( $\beta$ ) [ $\pi(\text{Ru}_2)$ ] $\rightarrow$ L+3( $\beta$ ) [ $\pi^*(\text{Ru}_2)$ ] (45%)<br>H-4( $\beta$ ) [ $\pi(\text{Ru}_2)$ ] $\rightarrow$ L+2( $\beta$ ) [ $\pi^*(\text{Ru}_2)$ ] (19%)<br>H-4( $\beta$ ) [ $\pi(\text{Ru}_2)$ ] $\rightarrow$ L+1( $\beta$ ) [ $\pi^*(\text{npc})$ ] (10%)                                                                                                           | B    |
| 14    | 583.1           | 0.0021 | H-1( $\alpha$ ) [ $\pi^*(\text{Ru}_2)$ ] $\rightarrow$ L( $\alpha$ ) [ $\pi^*(\text{npc})$ ] (92%)                                                                                                                                                                                                                                                                                                                   |      |
| 15    | 563.5           | 0.1154 | H-2( $\alpha$ ) [ $\delta^*(\text{Ru}_2)$ ] $\rightarrow$ L( $\alpha$ ) [ $\pi^*(\text{npc})$ ] (80%)<br>H( $\beta$ ) [ $\delta^*(\text{Ru}_2)$ ] $\rightarrow$ L( $\beta$ ) [ $\pi^*(\text{npc})$ ] (11%)                                                                                                                                                                                                           |      |
| 16    | 541.4           | 0.0047 | H-4( $\beta$ ) [ $\pi(\text{Ru}_2)$ ] $\rightarrow$ L+3( $\beta$ ) [ $\pi^*(\text{Ru}_2)$ ] (69%)                                                                                                                                                                                                                                                                                                                    | C    |
| 17    | 535.8           | 0.0102 | H-4( $\beta$ ) [ $\pi(\text{Ru}_2)$ ] $\rightarrow$ L+2( $\beta$ ) [ $\pi^*(\text{Ru}_2)$ ] (30%)<br>H-3( $\beta$ ) [ $\pi(\text{Ru}_2)$ ] $\rightarrow$ L+3( $\beta$ ) [ $\pi^*(\text{Ru}_2)$ ] (17%)<br>H-4( $\beta$ ) [ $\pi(\text{Ru}_2)$ ] $\rightarrow$ L+1( $\beta$ ) [ $\pi^*(\text{npc})$ ] (14%)<br>H( $\alpha$ ) [ $\pi^*(\text{Ru}_2)$ ] $\rightarrow$ L+6( $\alpha$ ) [ $\sigma^*(\text{Ru}_2)$ ] (13%) |      |
| 18    | 515.4           | 0.0569 | H-2( $\alpha$ ) [ $\delta^*(\text{Ru}_2)$ ] $\rightarrow$ L+1( $\alpha$ ) [ $\pi^*(\text{npc})$ ] (52%)<br>H( $\beta$ ) [ $\delta^*(\text{Ru}_2)$ ] $\rightarrow$ L+1( $\beta$ ) [ $\pi^*(\text{npc})$ ] (15%)                                                                                                                                                                                                       |      |
| 19    | 503.6           | 0.0058 | H-1( $\beta$ ) [ $\sigma(\text{Ru}_2)$ ] $\rightarrow$ L( $\beta$ ) [ $\pi^*(\text{npc})$ ] (88%)                                                                                                                                                                                                                                                                                                                    |      |



Table S6. Result of TDDFT calculation of **2** (H and L indicate the HOMO and LUMO, respectively).

| $S_n$ | Wavelength (nm) | $f$    | Major contributions                                                                                                                                                                                                                                                                                                                                                                                                   | Band |
|-------|-----------------|--------|-----------------------------------------------------------------------------------------------------------------------------------------------------------------------------------------------------------------------------------------------------------------------------------------------------------------------------------------------------------------------------------------------------------------------|------|
| 3     | 778.0           | 0.0030 | H-1( $\beta$ ) [ $\sigma(\text{Ru}_2)$ ] $\rightarrow$ L+2( $\beta$ ) [ $\pi^*(\text{Ru}_2)$ ] (47%)<br>H-1( $\beta$ ) [ $\sigma(\text{Ru}_2)$ ] $\rightarrow$ L+1( $\beta$ ) [ $\pi^*(\text{npc})$ ] (25%)<br>H-3( $\beta$ ) [ $\pi(\text{Ru}_2)$ ] $\rightarrow$ L+3( $\beta$ ) [ $\pi^*(\text{Ru}_2)$ ] (14%)                                                                                                      | A    |
| 4     | 761.6           | 0.0334 | H( $\beta$ ) [ $\delta^*(\text{Ru}_2)$ ] $\rightarrow$ L( $\beta$ ) [ $\pi^*(\text{npc})$ ] (81%)                                                                                                                                                                                                                                                                                                                     |      |
| 5     | 748.9           | 0.0098 | H( $\beta$ ) [ $\delta^*(\text{Ru}_2)$ ] $\rightarrow$ L+1( $\beta$ ) [ $\pi^*(\text{npc})$ ] (44%)<br>H( $\beta$ ) [ $\delta^*(\text{Ru}_2)$ ] $\rightarrow$ L+2( $\beta$ ) [ $\pi^*(\text{Ru}_2)$ ] (28%)<br>H-2( $\alpha$ ) [ $\delta^*(\text{Ru}_2)$ ] $\rightarrow$ L+1( $\alpha$ ) [ $\pi^*(\text{npc})$ ] (20%)                                                                                                |      |
| 12    | 612.4           | 0.0068 | H-3( $\beta$ ) [ $\pi(\text{Ru}_2)$ ] $\rightarrow$ L+3( $\beta$ ) [ $\pi^*(\text{Ru}_2)$ ] (46%)<br>H-4( $\beta$ ) [ $\pi(\text{Ru}_2)$ ] $\rightarrow$ L+2( $\beta$ ) [ $\pi^*(\text{Ru}_2)$ ] (17%)<br>H-4( $\beta$ ) [ $\pi(\text{Ru}_2)$ ] $\rightarrow$ L+1( $\beta$ ) [ $\pi^*(\text{npc})$ ] (12%)                                                                                                            | B    |
| 14    | 580.2           | 0.0017 | H-1( $\alpha$ ) [ $\pi^*(\text{Ru}_2)$ ] $\rightarrow$ L( $\alpha$ ) [ $\pi^*(\text{npc})$ ] (91%)                                                                                                                                                                                                                                                                                                                    |      |
| 15    | 562.3           | 0.1152 | H-2( $\alpha$ ) [ $\delta^*(\text{Ru}_2)$ ] $\rightarrow$ L( $\alpha$ ) [ $\pi^*(\text{npc})$ ] (79%)<br>H( $\beta$ ) [ $\delta^*(\text{Ru}_2)$ ] $\rightarrow$ L( $\beta$ ) [ $\pi^*(\text{npc})$ ] (11%)                                                                                                                                                                                                            |      |
| 16    | 540.9           | 0.0061 | H-4( $\beta$ ) [ $\pi(\text{Ru}_2)$ ] $\rightarrow$ L+3( $\beta$ ) [ $\pi^*(\text{Ru}_2)$ ] (69%)                                                                                                                                                                                                                                                                                                                     | C    |
| 17    | 537.4           | 0.0092 | H-4( $\beta$ ) [ $\pi(\text{Ru}_2)$ ] $\rightarrow$ L+2( $\beta$ ) [ $\pi^*(\text{Ru}_2)$ ] (28%)<br>H-4( $\beta$ ) [ $\pi(\text{Ru}_2)$ ] $\rightarrow$ L+1( $\beta$ ) [ $\pi^*(\text{npc})$ ] (17%)<br>H-3( $\beta$ ) [ $\pi(\text{Ru}_2)$ ] $\rightarrow$ L+3( $\beta$ ) [ $\pi^*(\text{Ru}_2)$ ] (16%)<br>H( $\alpha$ ) [ $\pi^*(\text{Ru}_2)$ ] $\rightarrow$ L+8( $\alpha$ ) [ $\sigma^*(\text{Ru}_2)$ ] (12%), |      |
| 18    | 515.7           | 0.0792 | H-2( $\alpha$ ) [ $\delta^*(\text{Ru}_2)$ ] $\rightarrow$ L+1( $\alpha$ ) [ $\pi^*(\text{npc})$ ] (53%)<br>H( $\beta$ ) [ $\delta^*(\text{Ru}_2)$ ] $\rightarrow$ L+1( $\beta$ ) [ $\pi^*(\text{npc})$ ] (14%)                                                                                                                                                                                                        |      |
| 19    | 502.4           | 0.0057 | H-1( $\beta$ ) [ $\sigma(\text{Ru}_2)$ ] $\rightarrow$ L( $\beta$ ) [ $\pi^*(\text{npc})$ ] (90%)                                                                                                                                                                                                                                                                                                                     |      |

Table S7. Result of TDDFT calculation of **3** (H and L indicate the HOMO and LUMO, respectively).

| $S_n$ | Wavelength (nm) | $f$    | Major contributions                                                                                                                                                                                                                                                                              | Band |
|-------|-----------------|--------|--------------------------------------------------------------------------------------------------------------------------------------------------------------------------------------------------------------------------------------------------------------------------------------------------|------|
| 6     | 701.3           | 0.0016 | H( $\alpha$ ) [ $\pi^*(Ru_2)$ ] $\rightarrow$ L+1( $\alpha$ ) [ $\pi^*(\mu-npc)$ ] (35%),<br>H-3( $\beta$ ) [ $\delta(Ru_2)$ ] $\rightarrow$ L( $\beta$ ) [ $\pi^*(Ru_2)/\pi^*(\eta^2-npc)$ ] (29%),<br>H( $\beta$ ) [ $\delta^*(Ru_2)$ ] $\rightarrow$ L+4( $\beta$ ) [ $\pi^*(Ru_2)$ ] (12%)   | A'   |
| 9     | 666.5           | 0.0101 | H-2( $\beta$ ) [ $\pi(Ru_2)$ ] $\rightarrow$ L+4( $\beta$ ) [ $\pi^*(Ru_2)$ ] (36%),<br>H-4( $\beta$ ) [ $\pi(Ru_2)$ ] $\rightarrow$ L( $\beta$ ) [ $\pi^*(Ru_2)/\pi^*(\eta^2-npc)$ ] (18%)                                                                                                      |      |
| 10    | 654.5           | 0.0186 | H( $\beta$ ) [ $\delta^*(Ru_2)$ ] $\rightarrow$ L+1( $\beta$ ) [ $\pi^*(\mu-npc)$ ] (76%),<br>H-2( $\alpha$ ) [ $\delta^*(Ru_2)$ ] $\rightarrow$ L( $\alpha$ ) [ $\pi^*(\mu-npc)$ ] (11%)                                                                                                        |      |
| 11    | 653.1           | 0.0129 | H( $\beta$ ) [ $\delta^*(Ru_2)$ ] $\rightarrow$ L+2( $\beta$ ) [ $\pi^*(\mu-npc)$ ] (69%),<br>H-2( $\alpha$ ) [ $\delta^*(Ru_2)$ ] $\rightarrow$ L+1( $\alpha$ ) [ $\pi^*(\mu-npc)$ ] (21%)                                                                                                      |      |
| 17    | 589.4           | 0.023  | H-1( $\alpha$ ) [ $\pi^*(Ru_2)$ ] $\rightarrow$ L+2( $\alpha$ ) [ $\pi^*(\eta^2-npc)$ ] (25%),<br>H( $\alpha$ ) [ $\pi^*(Ru_2)$ ] $\rightarrow$ L+8( $\alpha$ ) [ $\sigma^*(Ru_2)$ ] (10%)                                                                                                       | B'   |
| 20    | 555.1           | 0.0028 | H( $\beta$ ) [ $\delta^*(Ru_2)$ ] $\rightarrow$ L+3( $\beta$ ) [ $\pi^*(\eta^2-npc)$ ] (62%),<br>H-1( $\alpha$ ) [ $\pi^*(Ru_2)$ ] $\rightarrow$ L+2( $\alpha$ ) [ $\pi^*(\eta^2-npc)$ ] (20%)                                                                                                   |      |
| 24    | 523.1           | 0.0107 | H( $\beta$ ) [ $\delta^*(Ru_2)$ ] $\rightarrow$ L+5( $\beta$ ) [ $\pi^*(Ru_2)/\pi^*(\eta^2-npc)$ ] (59%),<br>H( $\beta$ ) [ $\delta^*(Ru_2)$ ] $\rightarrow$ L( $\beta$ ) [ $\pi^*(Ru_2)/\pi^*(\eta^2-npc)$ ] (17%)                                                                              | C'   |
| 25    | 511.1           | 0.0473 | H-2( $\alpha$ ) [ $\delta^*(Ru_2)$ ] $\rightarrow$ L( $\alpha$ ) [ $\pi^*(\mu-npc)$ ] (53%),<br>H-3( $\beta$ ) [ $\delta(Ru_2)$ ] $\rightarrow$ L+2( $\beta$ ) [ $\pi^*(\mu-npc)$ ] (16%),<br>H( $\beta$ ) [ $\delta^*(Ru_2)$ ] $\rightarrow$ L+1( $\beta$ ) [ $\pi^*(\mu-npc)$ ] (11%)          |      |
| 26    | 505.7           | 0.0467 | H-3( $\beta$ ) [ $\delta(Ru_2)$ ] $\rightarrow$ L+2( $\beta$ ) [ $\pi^*(\mu-npc)$ ] (30%),<br>H( $\alpha$ ) [ $\pi^*(Ru_2)$ ] $\rightarrow$ L+8( $\alpha$ ) [ $\sigma^*(Ru_2)$ ] (26%),<br>H-2( $\alpha$ ) [ $\delta^*(Ru_2)$ ] $\rightarrow$ L( $\alpha$ ) [ $\pi^*(\mu-npc)$ ] (24%)           |      |
| 27    | 500.8           | 0.0924 | H-1( $\beta$ ) [ $\sigma(Ru_2)$ ] $\rightarrow$ L+3( $\beta$ ) [ $\pi^*(\eta^2-npc)$ ] (49%),<br>H-1( $\alpha$ ) [ $\pi^*(Ru_2)$ ] $\rightarrow$ L+3( $\alpha$ ) [ $\pi^*(\eta^2-npc)$ ] (23%),<br>H-2( $\alpha$ ) [ $\delta^*(Ru_2)$ ] $\rightarrow$ L+1( $\alpha$ ) [ $\pi^*(\mu-npc)$ ] (10%) |      |
